# Supplementary material for: Valproic Acid Enhances Reprogramming Efficiency and Neuronal Differentiation on Small Molecules Staged-Induction Neural Stem Cells: Suggested Role of mTOR Signaling
Source: PubMed Central journal article supplement (PMC6737087; doi:10.3389/fnins.2019.00867), 2019-09-04
Supplement: Table_1.pdf [file Table_1.pdf]

Supplementary Table 1. Primer Information

| Gene   |         | Primer sequence (5'-3') |
|--------|---------|-------------------------|
| GAPDH  | Forward | actcaacagcaactcccactc   |
|        | Reverse | taggccctcctgttattatgg   |
| Nestin | Forward | ggcatccctgaattacccaa    |
|        | Reverse | agctcatgggcatctgtcaa    |
| Sox2   | Forward | tctgtggcaagtccgaggc     |
|        | Reverse | ttctccagttcgcagtccag    |
| Oct4   | Forward | ccaacgagaagagtatgaggc   |
|        | Reverse | caaatgatgagtacagacagg   |
| Sox1   | Forward | aacggagacttcgagccgacaa  |
|        | Reverse | accacttgccaaagaggccgat  |
